# Supplementary material for: Impact of Syndromic Molecular Diagnostics on Antimicrobial Adequacy and Time to Therapy in Critically Ill Patients with Pneumonia: A Systematic Review and Meta-Analysis of Randomized Trials
Source: Research Square preprint supplement (doi:10.21203/rs.3.rs-6951342/v1), 2025-07-02

**Supplementary Material**

Summary

[Supplementary Table S1 – Search Strategy 2](#_Toc198307286)

[Supplementary Table S2 – Risk of Bias Assessment (RoB 2 Tool) 3](#_Toc198307287)

[Supplementary Table S3 – Summary of Included Studies 4](#_Toc198307288)

[Supplementary Table S4 – GRADE Assessment of Certainty of Evidence 5](#_Toc198307289)

[Supplementary Figure S1. Funnel plot assessing publication bias for the outcome of adequate antimicrobial therapy. 6](#_Toc198307290)

[Supplementary Figure S2. Funnel plot for the outcome of time to targeted therapy. 8](#_Toc198307291)

[Supplementary Figure S3. Sensitivity Analysis for antibiotic adequacy without inhale WP3. 9](#_Toc198307292)

[Supplementary Figure S4. Sensitivity analysis for antibiotic adequacy without the FLAGSHIP II trial. 10](#_Toc198307293)

[Supplementary Figure S5. Sensitivity analysis for antibiotic adequacy without the Poole study 11](#_Toc198307294)

[Supplementary Figure S6. Sensitivity analysis for time to effective therapy without the INHALE WP3 study. 12](#_Toc198307295)

[Supplementary Figure S7. Sensitivity analysis for time to effective therapy without the Virk et al trial. 13](#_Toc198307296)

| **Pubmed** | ("Pneumonia"[Mesh] OR pneumonia[tiab] OR "ventilator-associated pneumonia"[tiab] OR VAP[tiab] OR "hospital-acquired pneumonia"[tiab] OR "nosocomial pneumonia"[tiab])  AND  ("Intensive Care Units"[Mesh] OR "Critical Care"[Mesh] OR ICU[tiab] OR "intensive care"[tiab] OR "critical care"[tiab])  AND  ("Polymerase Chain Reaction"[Mesh] OR PCR[tiab] OR "multiplex PCR"[tiab] OR "syndromic PCR"[tiab] OR "rapid molecular diagnostics"[tiab] OR "molecular testing"[tiab] OR "nucleic acid amplification"[tiab] OR "panel testing"[tiab])  AND  (randomized[tiab] OR randomised[tiab] OR RCT[tiab] OR "randomized trial"[tiab] OR "randomised trial"[tiab] OR "clinical trial"[tiab] OR multicenter[tiab]) |
| --- | --- |
| **EMBASE** | ('pneumonia'/exp OR 'pneumonia':ti,ab,kw OR 'ventilator-associated pneumonia':ti,ab,kw OR 'vap':ti,ab,kw OR 'hospital-acquired pneumonia':ti,ab,kw OR 'nosocomial pneumonia':ti,ab,kw) AND ('intensive care unit'/exp OR 'intensive care'/exp OR 'icu':ti,ab,kw OR 'intensive care':ti,ab,kw OR 'critical care':ti,ab,kw) AND ('polymerase chain reaction'/exp OR 'pcr':ti,ab,kw OR 'multiplex pcr':ti,ab,kw OR 'syndromic pcr':ti,ab,kw OR 'rapid molecular diagnostics':ti,ab,kw OR 'molecular testing':ti,ab,kw OR 'nucleic acid amplification':ti,ab,kw OR 'panel testing':ti,ab,kw) AND ('randomized':ti,ab,kw OR 'randomised':ti,ab,kw OR 'rct':ti,ab,kw OR 'randomized trial':ti,ab,kw OR 'randomised trial':ti,ab,kw OR 'clinical trial':ti,ab,kw OR 'multicenter':ti,ab,kw) |
| **Cochrane Library** | (pneumonia:ti,ab,kw OR "ventilator-associated pneumonia":ti,ab,kw OR vap:ti,ab,kw OR "hospital-acquired pneumonia":ti,ab,kw OR "nosocomial pneumonia":ti,ab,kw)  AND  ("intensive care":ti,ab,kw OR "critical care":ti,ab,kw OR icu:ti,ab,kw)  AND  ("polymerase chain reaction":ti,ab,kw OR pcr:ti,ab,kw OR "multiplex pcr":ti,ab,kw OR "syndromic pcr":ti,ab,kw OR "rapid molecular diagnostics":ti,ab,kw OR "molecular testing":ti,ab,kw OR "nucleic acid amplification":ti,ab,kw OR "panel testing":ti,ab,kw)  AND  (randomized:ti,ab,kw OR randomised:ti,ab,kw OR rct:ti,ab,kw OR "randomized trial":ti,ab,kw OR "randomised trial":ti,ab,kw OR "clinical trial":ti,ab,kw OR multicenter:ti,ab,kw) |

# Supplementary Table S1 – Search Strategy

# Supplementary Table S2 – Risk of Bias Assessment (RoB 2 Tool)

| **Study** | **Randomization Process** | **Deviations from Intended Interventions** | **Missing Outcome Data** | **Measurement of the Outcome** | **Selection of the Reported Result** | **Overall Risk of Bias** |
| --- | --- | --- | --- | --- | --- | --- |
| **INHALE WP3 (2025)** | Low | Low | Low | Low | Low | Low |
| **FLAGSHIP II (2022)** | Low | Some concerns | Low | Low | Some concerns | Some concerns |
| **Virk et al. (2024)** | Low | Low | Low | Low | Low | Low |
| **Poole et al. (2022)** | Low | Low | Low | Low | Low | Low |

# Supplementary Table S3 – Summary of Included Studies

| **Study** | **Country** | **Sample Size (PCR/Control)** | **PCR Platform** | **Pneumonia Type** | **Follow-up Duration** | **Main Outcomes Assessed** |
| --- | --- | --- | --- | --- | --- | --- |
| **INHALE WP3 (2025)** | UK | 223 / 219 | FilmArray | HAP, VAP | 28 days | Antibiotic adequacy, mortality |
| **FLAGSHIP II (2022)** | Switzerland | 71 / 59 | Seegene, RespiFinder | CAP, HAP | 30 days | Time to therapy, de-escalation |
| **Virk et al. (2024)** | USA | 563 / 589 | FilmArray | HAP, VAP | 30 days | Antibiotic changes, mortality |
| **Poole et al. (2022)** | UK | 100 / 100 | FilmArray | Mixed | 60 days | Antibiotic de-escalation |

# Supplementary Table S4 – GRADE Assessment of Certainty of Evidence

| **Outcome** | **Risk of Bias** | **Inconsistency** | **Indirectness** | **Imprecision** | **Publication Bias** | **Overall Certainty** |
| --- | --- | --- | --- | --- | --- | --- |
| **Adequacy of initial antimicrobial therapy** | Low to moderate | High (I² = 83%) | None | Moderate (wide CI) | Possible (n=4) | Moderate |
| **Time to effective antibiotic therapy** | Low to moderate | Very high (I² = 100%) | None | High (wide CI) | Possible (n=4) | Low |
| **In-hospital mortality** | Low | None (I² = 0%) | None | Moderate | Unlikely | Moderate |

# Supplementary Figure S1. Funnel plot assessing publication bias for the outcome of adequate antimicrobial therapy.

The x-axis represents the odds ratio (log-transformed), and the y-axis displays the standard error of the effect size. Each point represents a study, labeled with its study name. Visual inspection suggests possible asymmetry, potentially indicative of publication bias or small-study effects. However, given the small number of included studies (n = 4), this observation should be interpreted with caution.


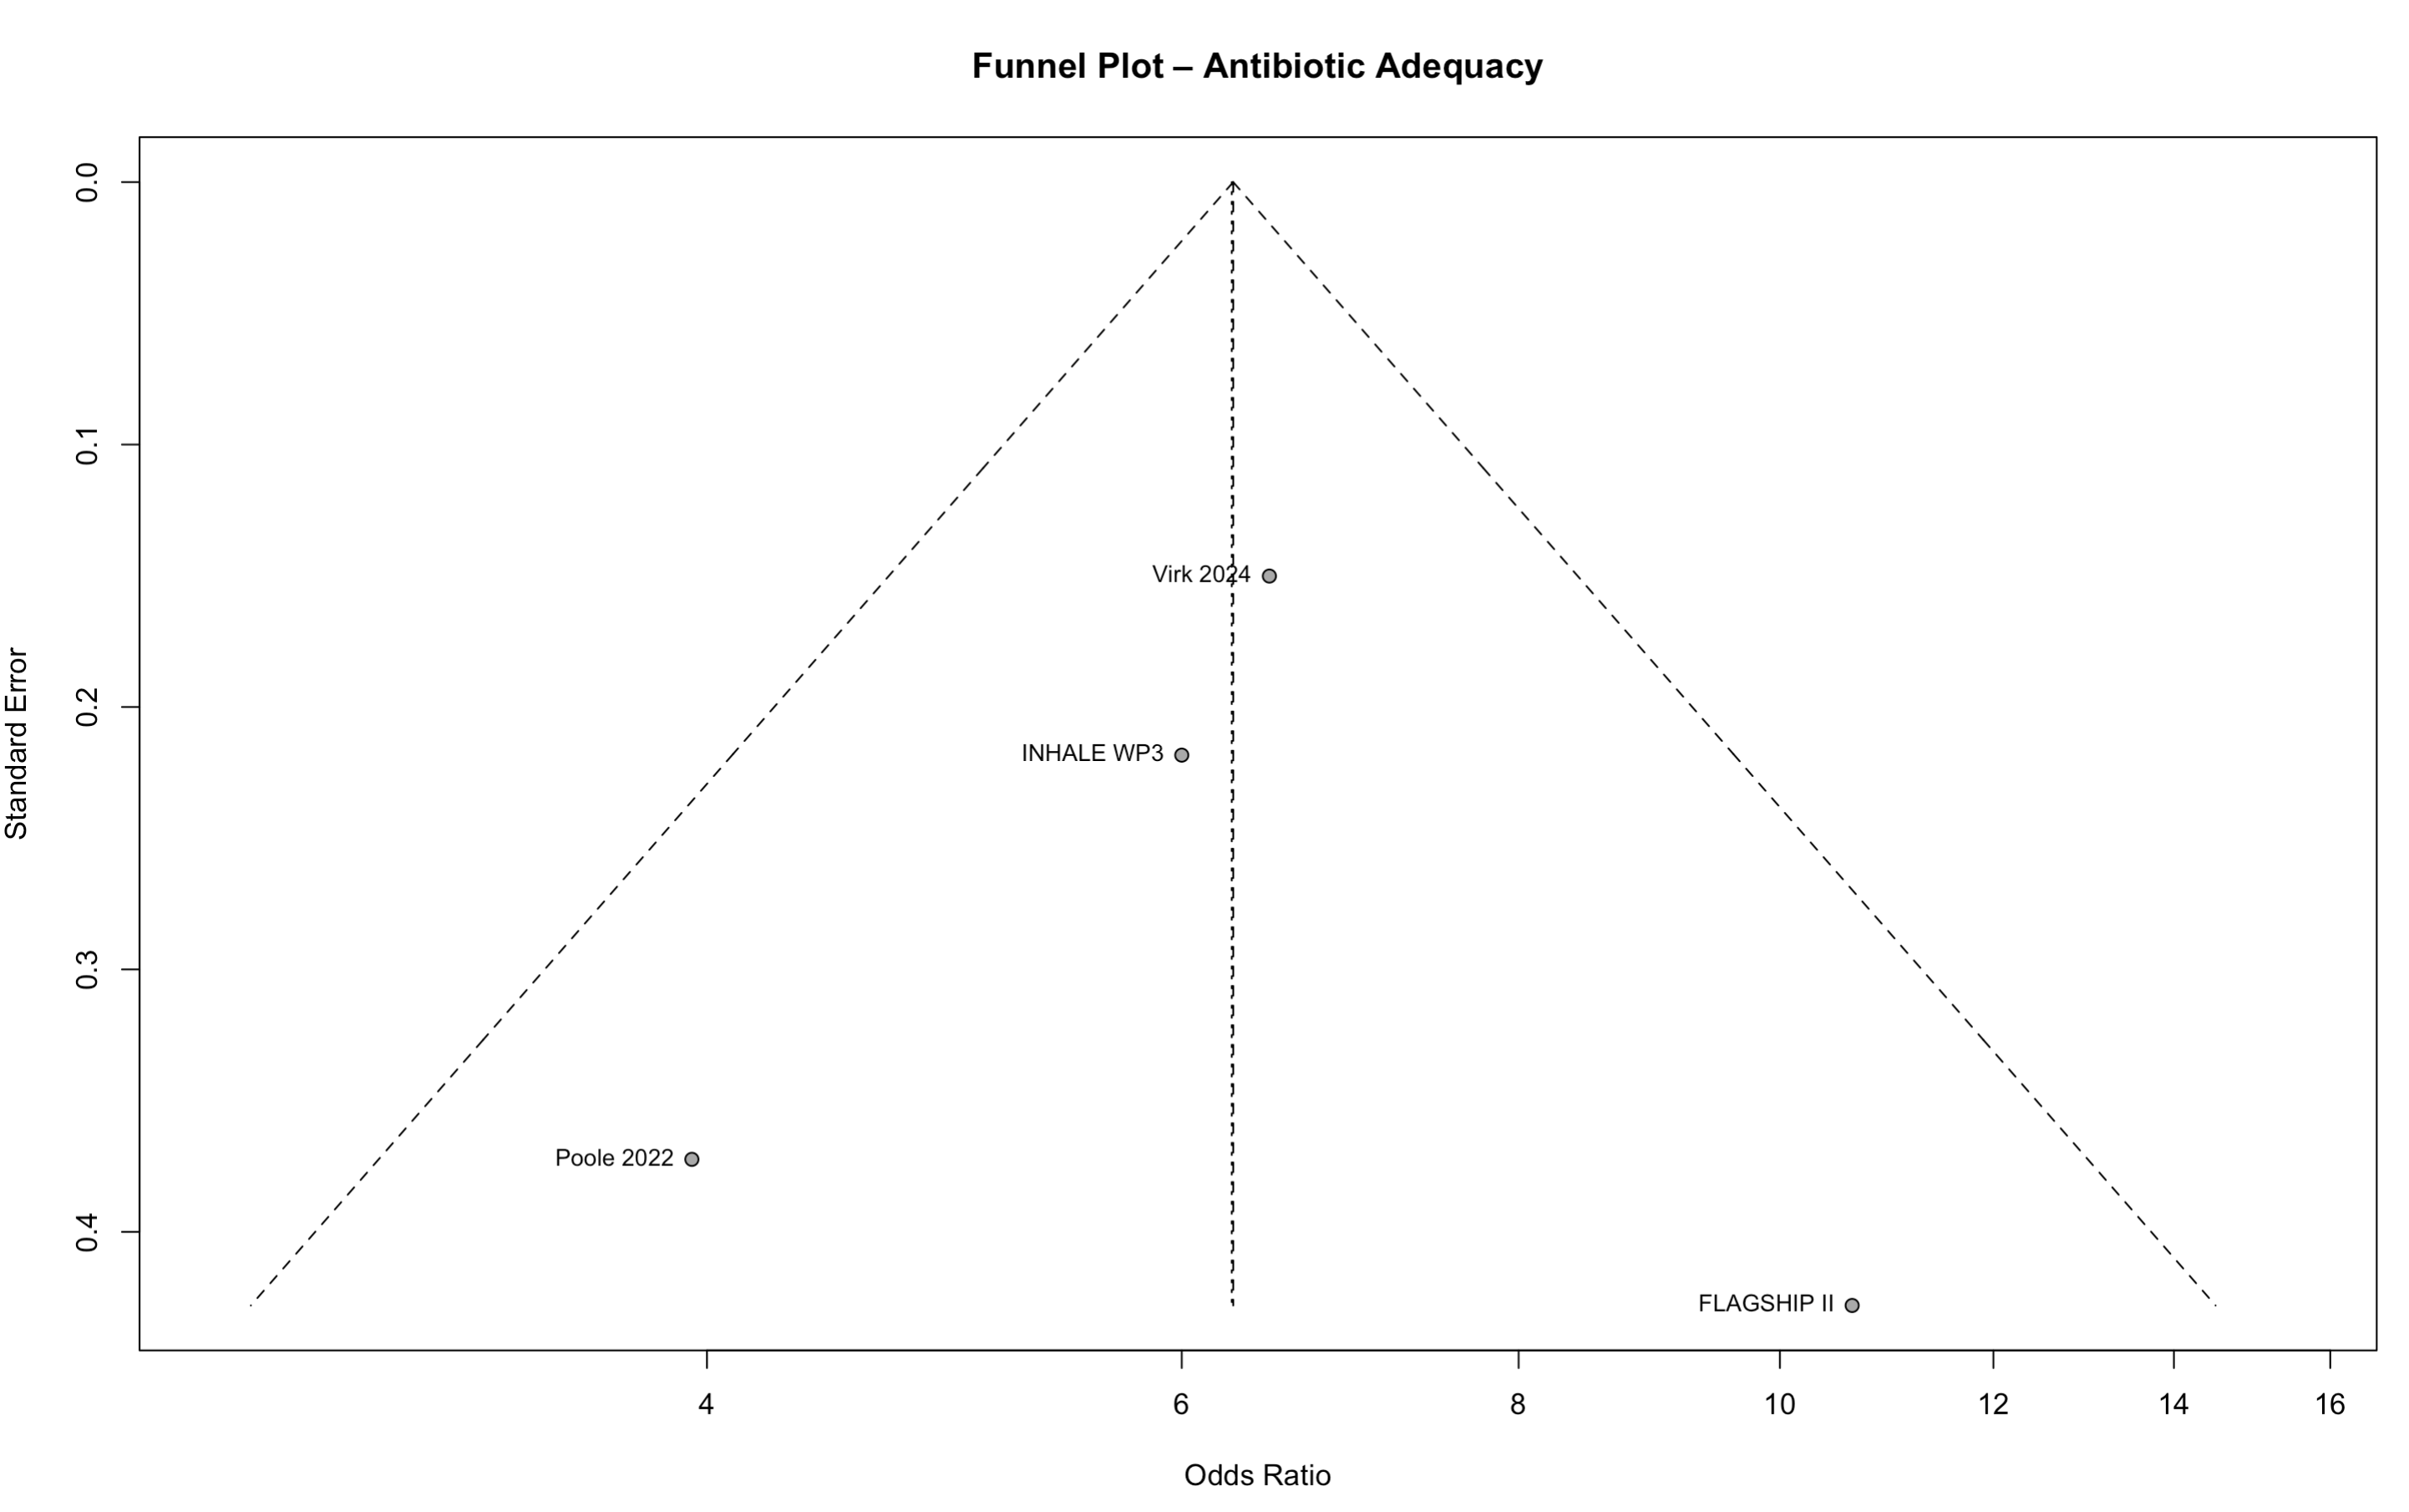


# ****Supplementary Figure S2****. Funnel plot for the outcome of time to targeted therapy.

The plot displays mean differences in hours (x-axis) against their standard errors (y-axis). Study labels are shown adjacent to their corresponding data points. Interpretation of symmetry is limited by the small number of included studies (n = 4).


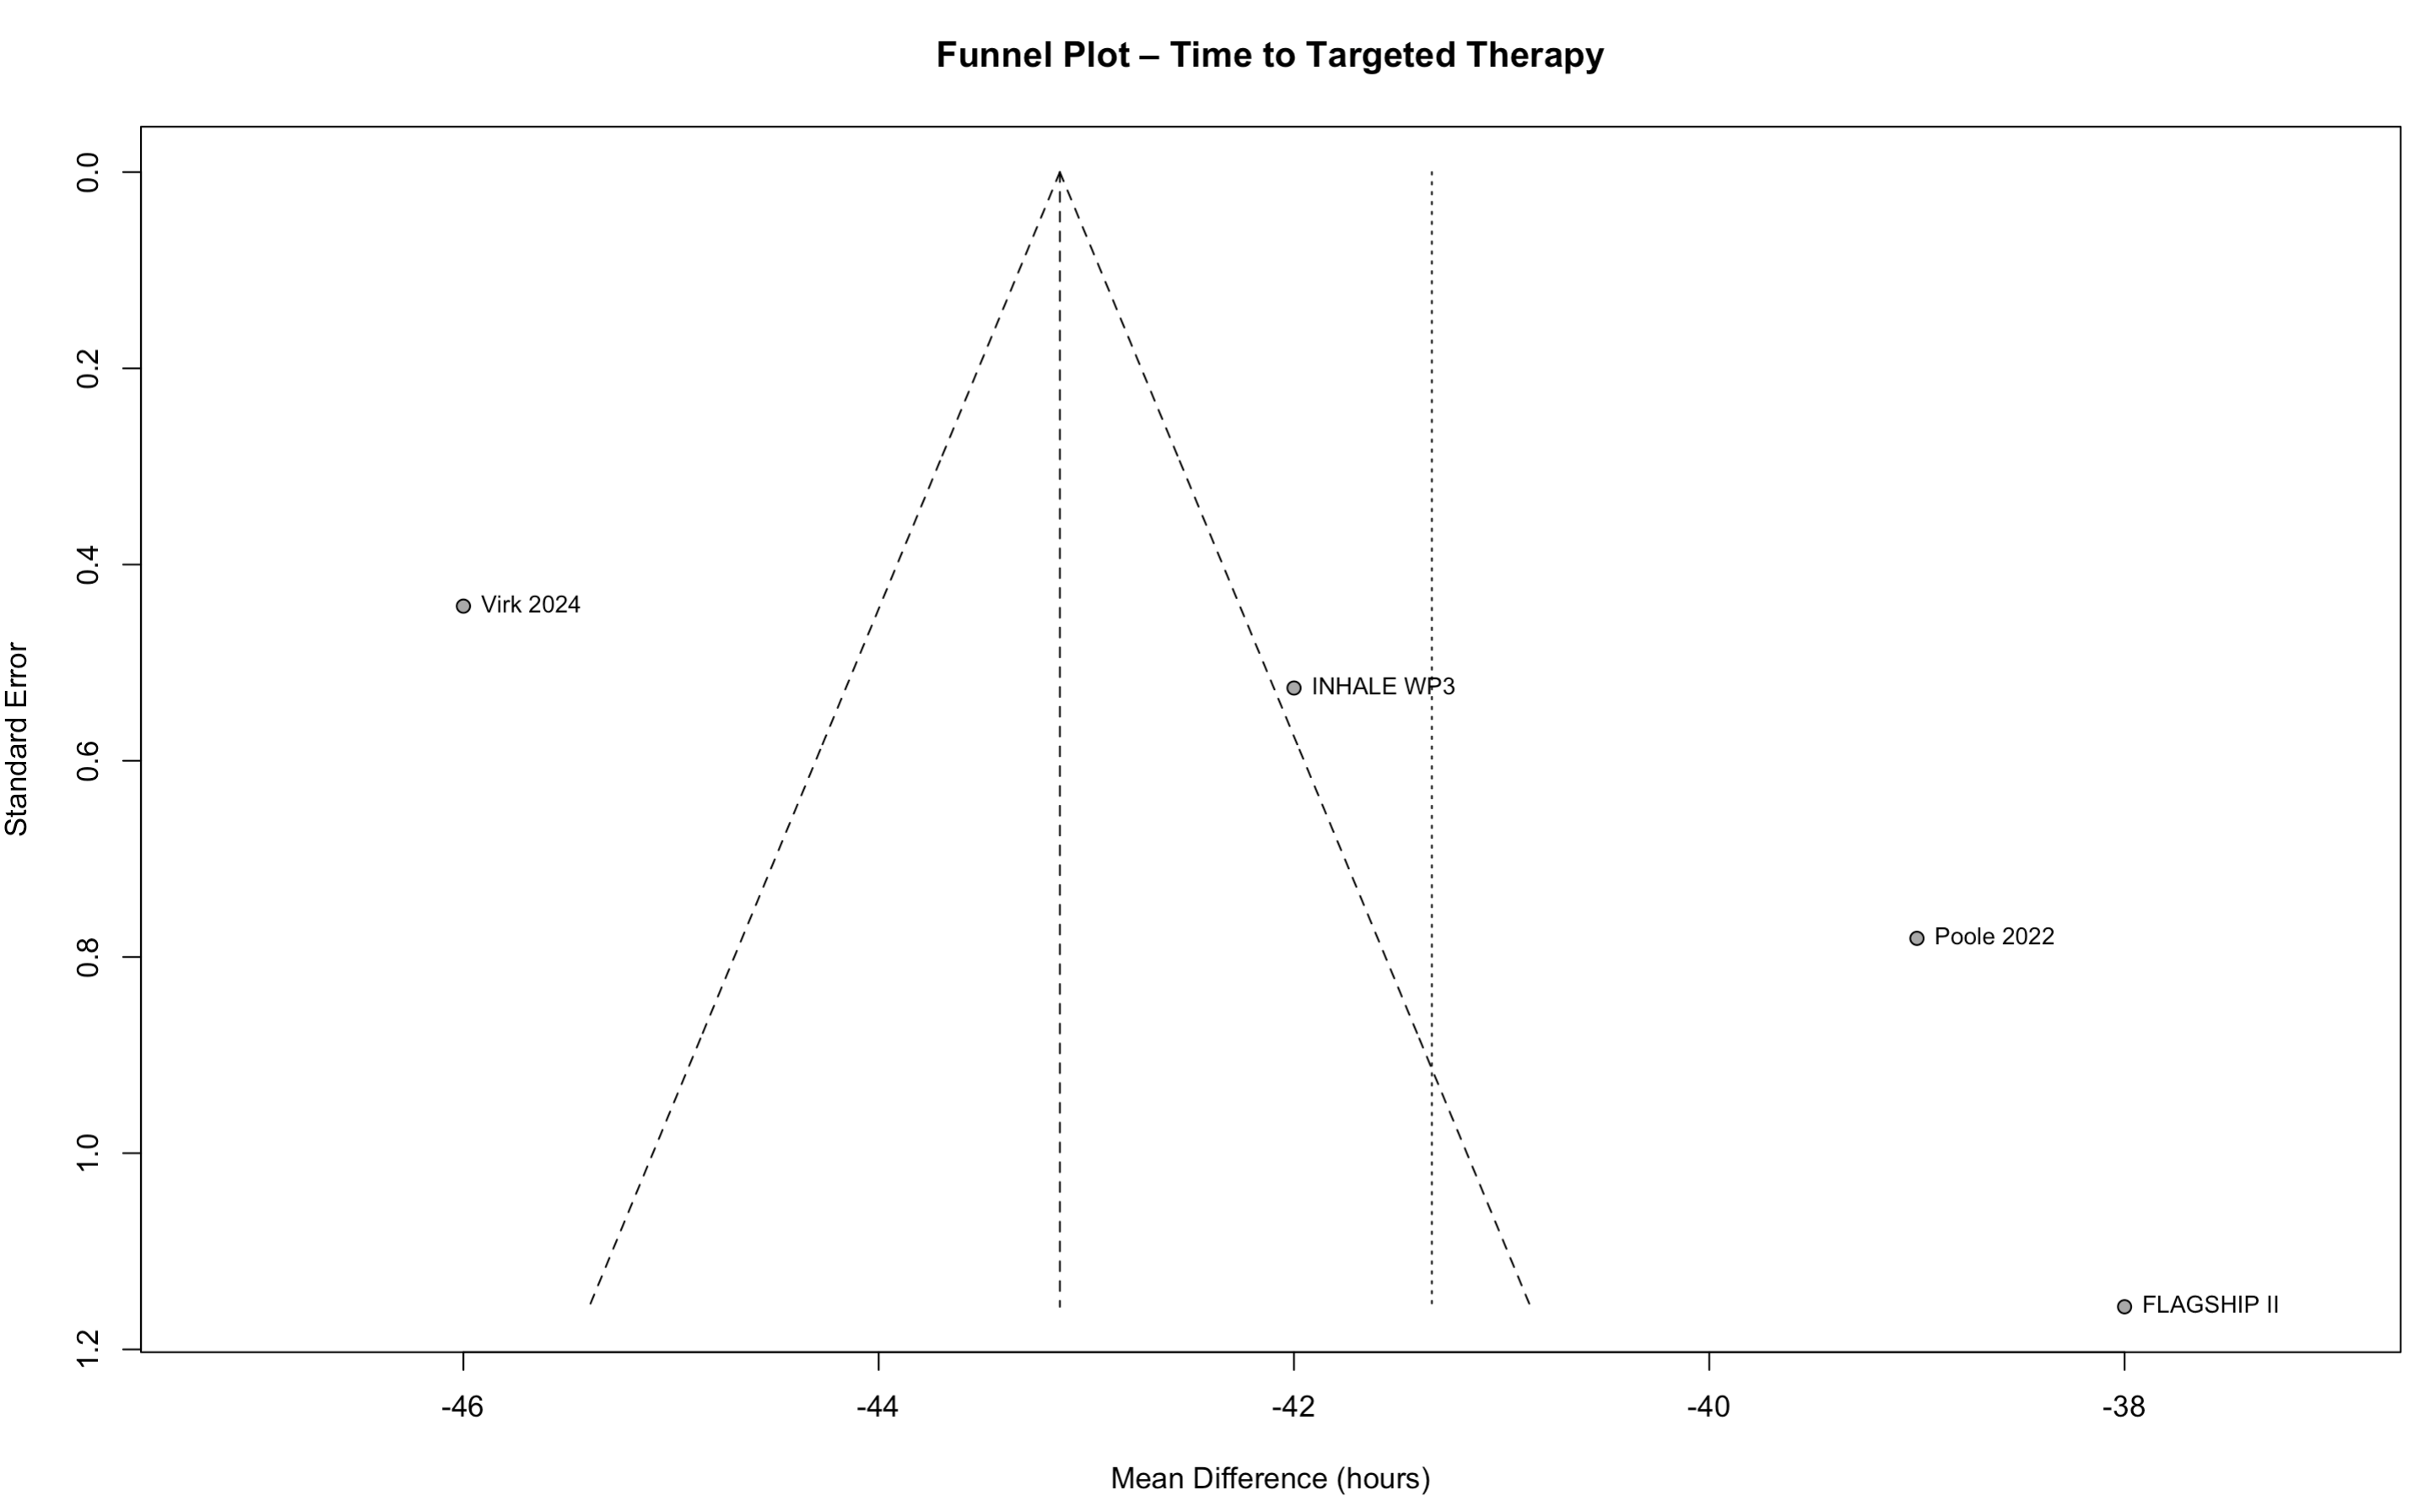


# ****Supplementary Figure S3****. Sensitivity Analysis for antibiotic adequacy without inhale WP3.

Pooled analysis including the FLAGSHIP II and Poole studies demonstrated a significant benefit for syndromic PCR panels (OR 7.92; 95% CI 4.83–13.00; I² = 0%).


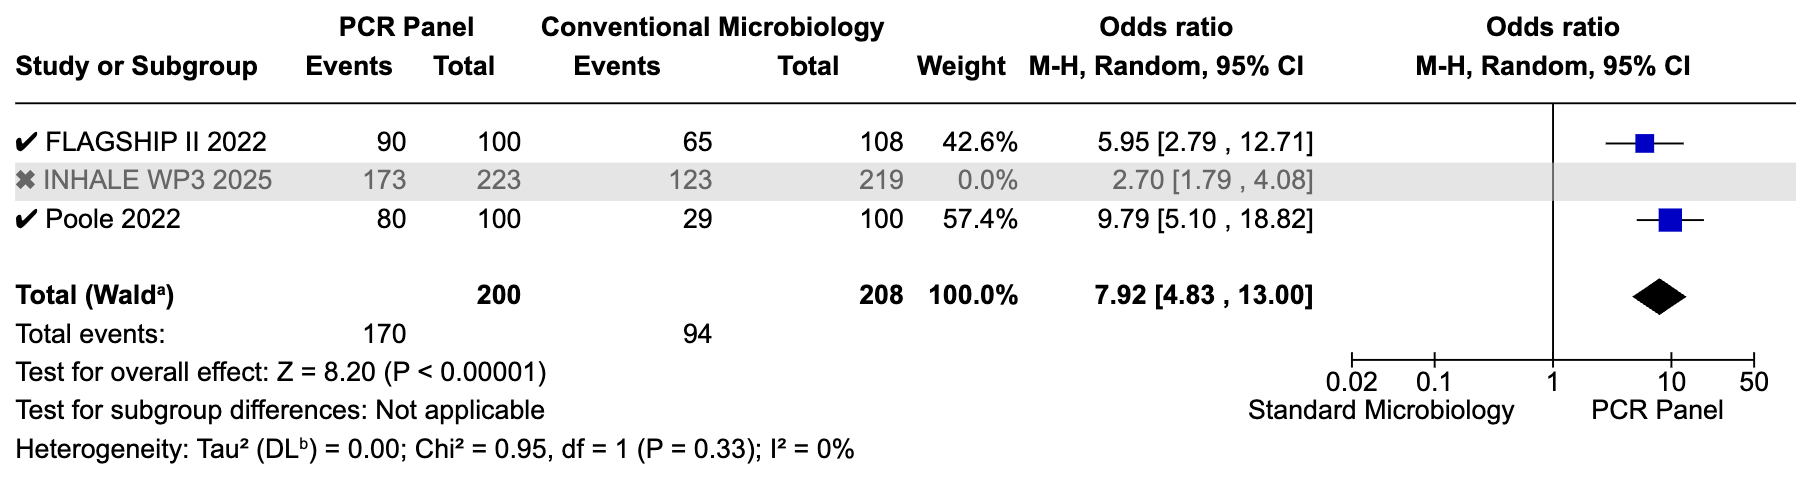


#

# Supplementary Figure S4. Sensitivity analysis for antibiotic adequacy without the FLAGSHIP II trial.

The pooled effect including the INHALE WP3 and Poole studies remained significant (OR 5.01; 95% CI 1.42–17.69), although with substantial heterogeneity (I² = 91%).


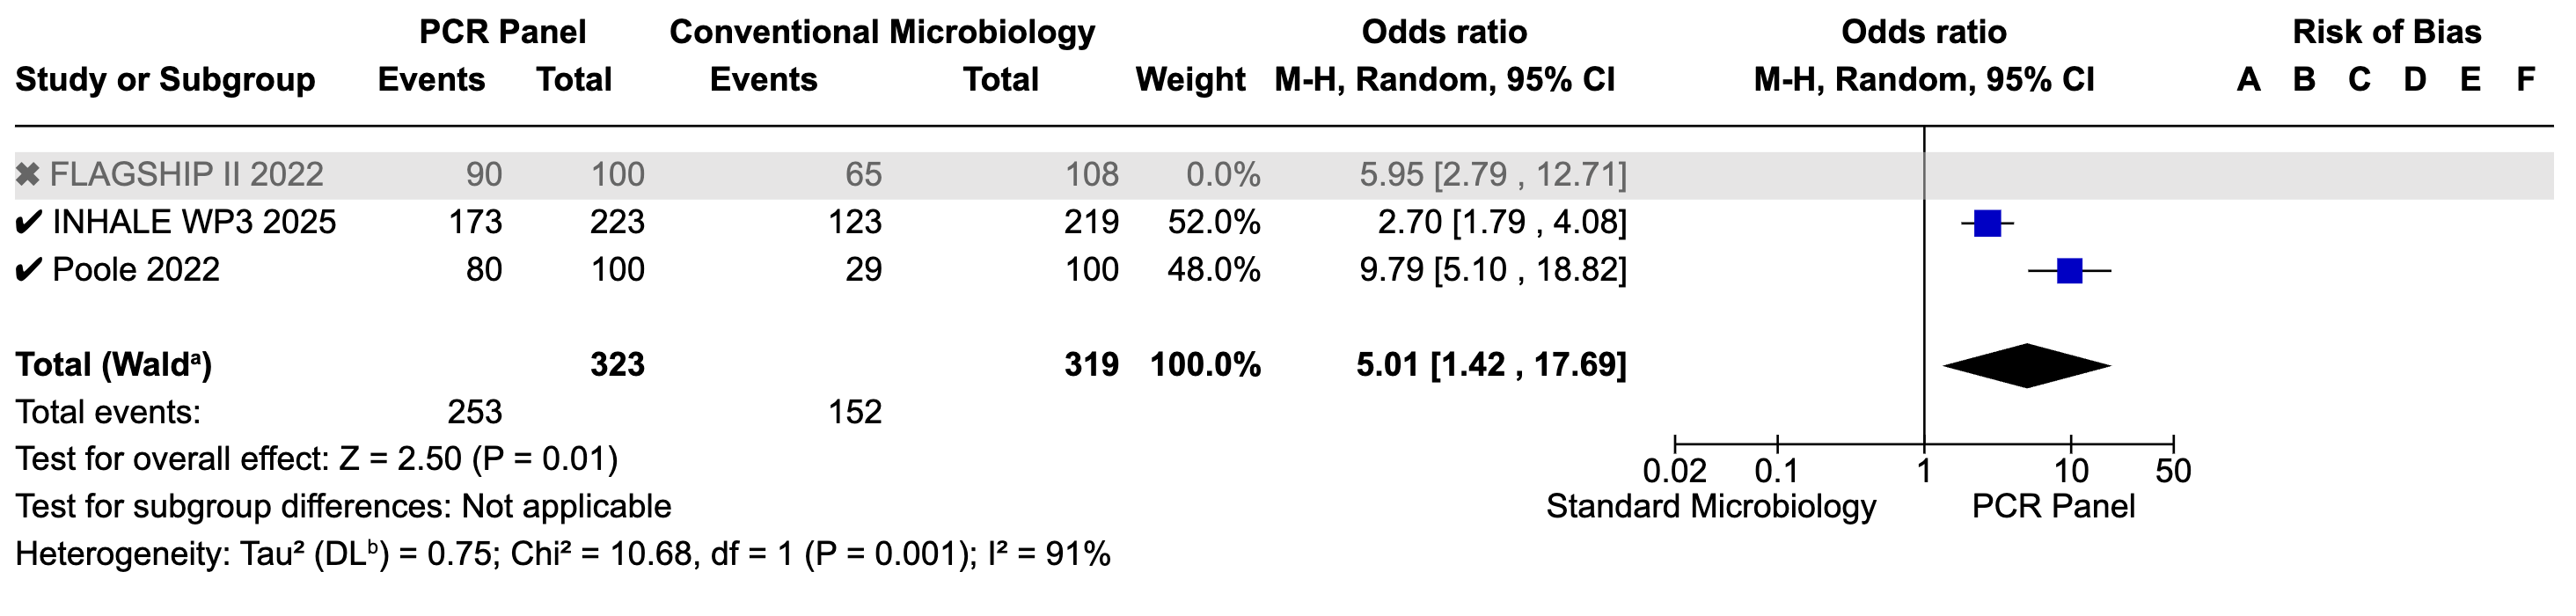


# ****Supplementary Figure S5.**** Sensitivity analysis for antibiotic adequacy without the Poole study

Pooled effect from FLAGSHIP II and INHALE WP3 remained significant (OR 3.75; 95% CI 1.75–8.06), with moderate heterogeneity (I² = 69%).


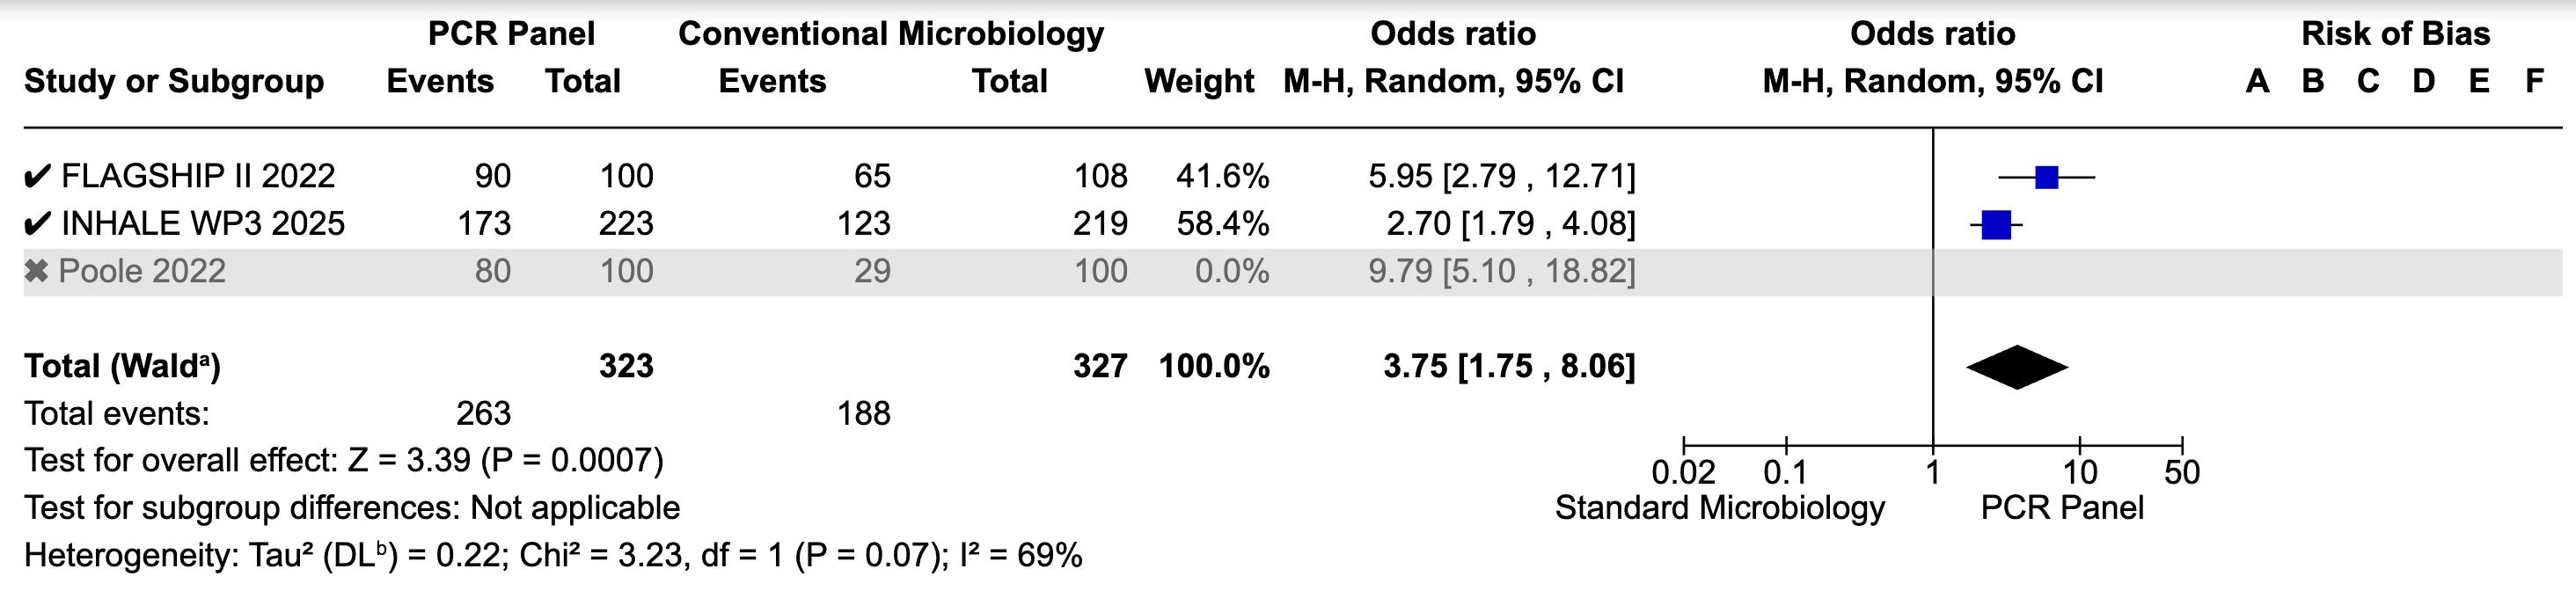


# ****Supplementary Figure S6.**** Sensitivity analysis for time to effective therapy without the INHALE WP3 study.

Results from FLAGSHIP II, Poole, and Virk trials continued to favor PCR testing, with a pooled mean difference of –26.76 hours (95% CI –47.84 to –5.68), despite high heterogeneity (I² = 100%).


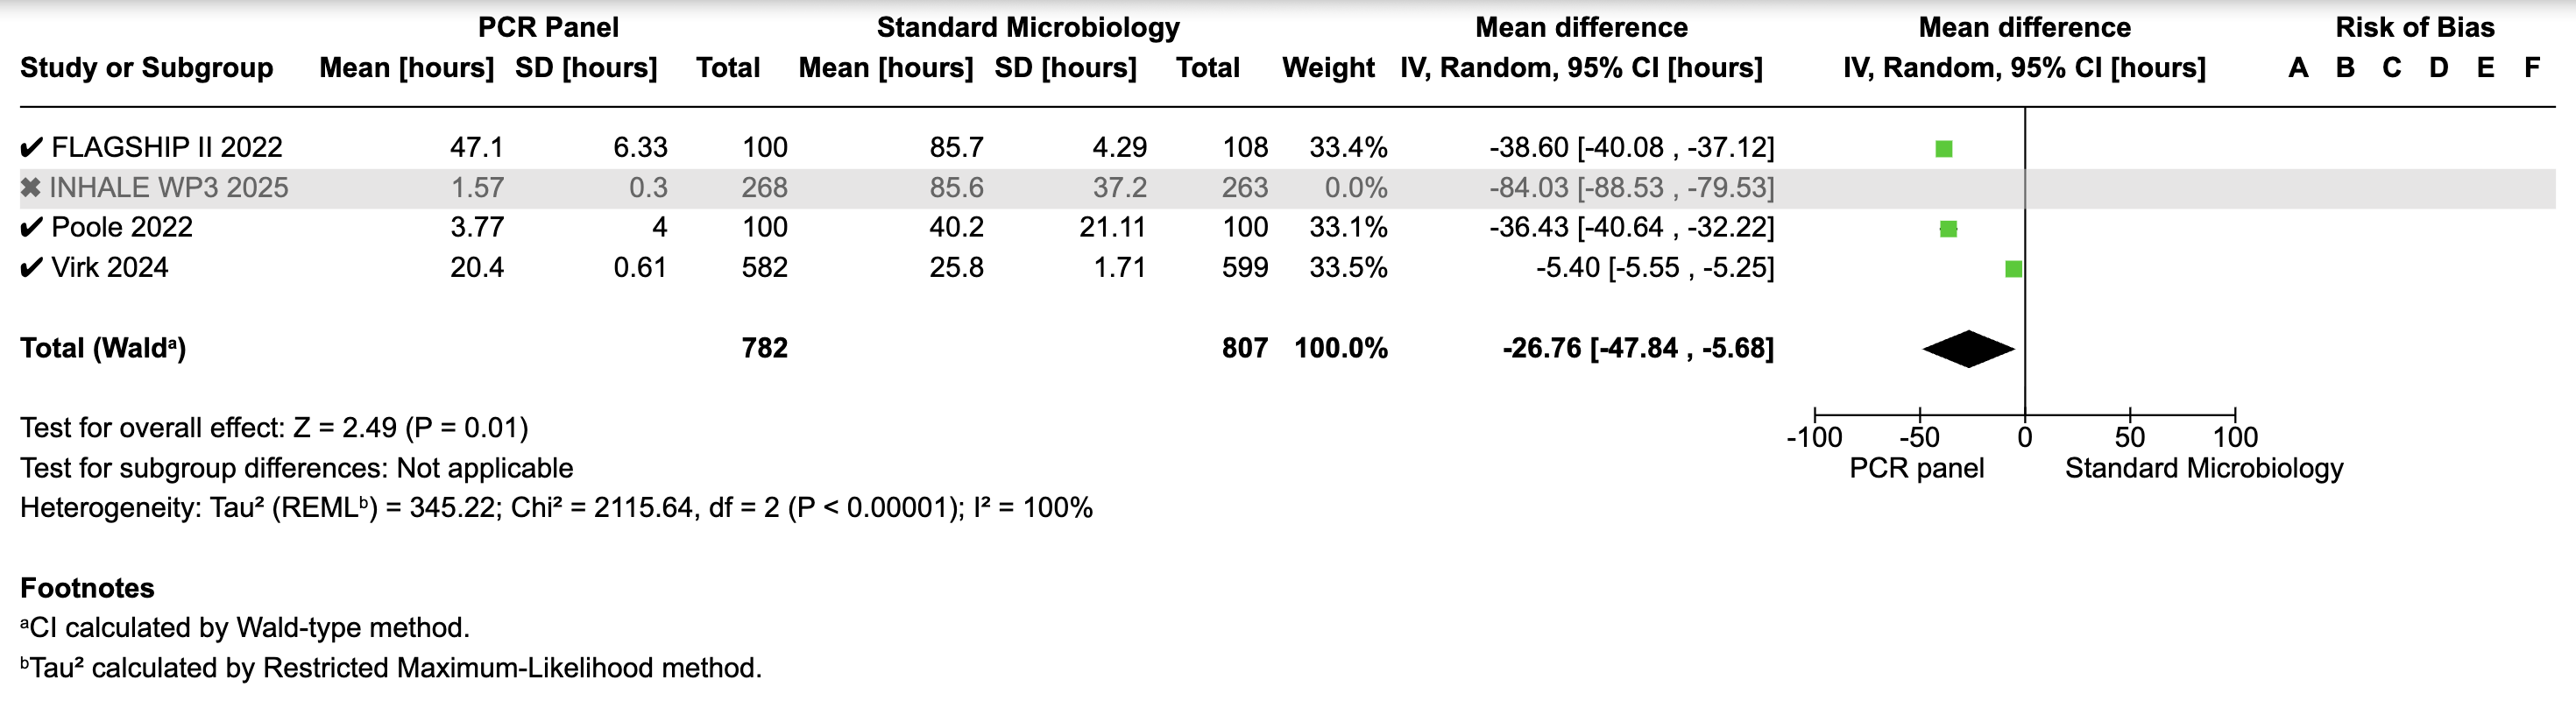


# ****Supplementary Figure S7.**** Sensitivity analysis for time to effective therapy without the Virk et al trial.

The pooled result of the FLAGSHIP II, INHALE WP3, and Poole studies showed a significantly shorter time to effective antibiotic therapy in the PCR group compared to standard microbiology (mean difference –52.98 hours; 95% CI –83.36 to –22.61; I² = 100%).


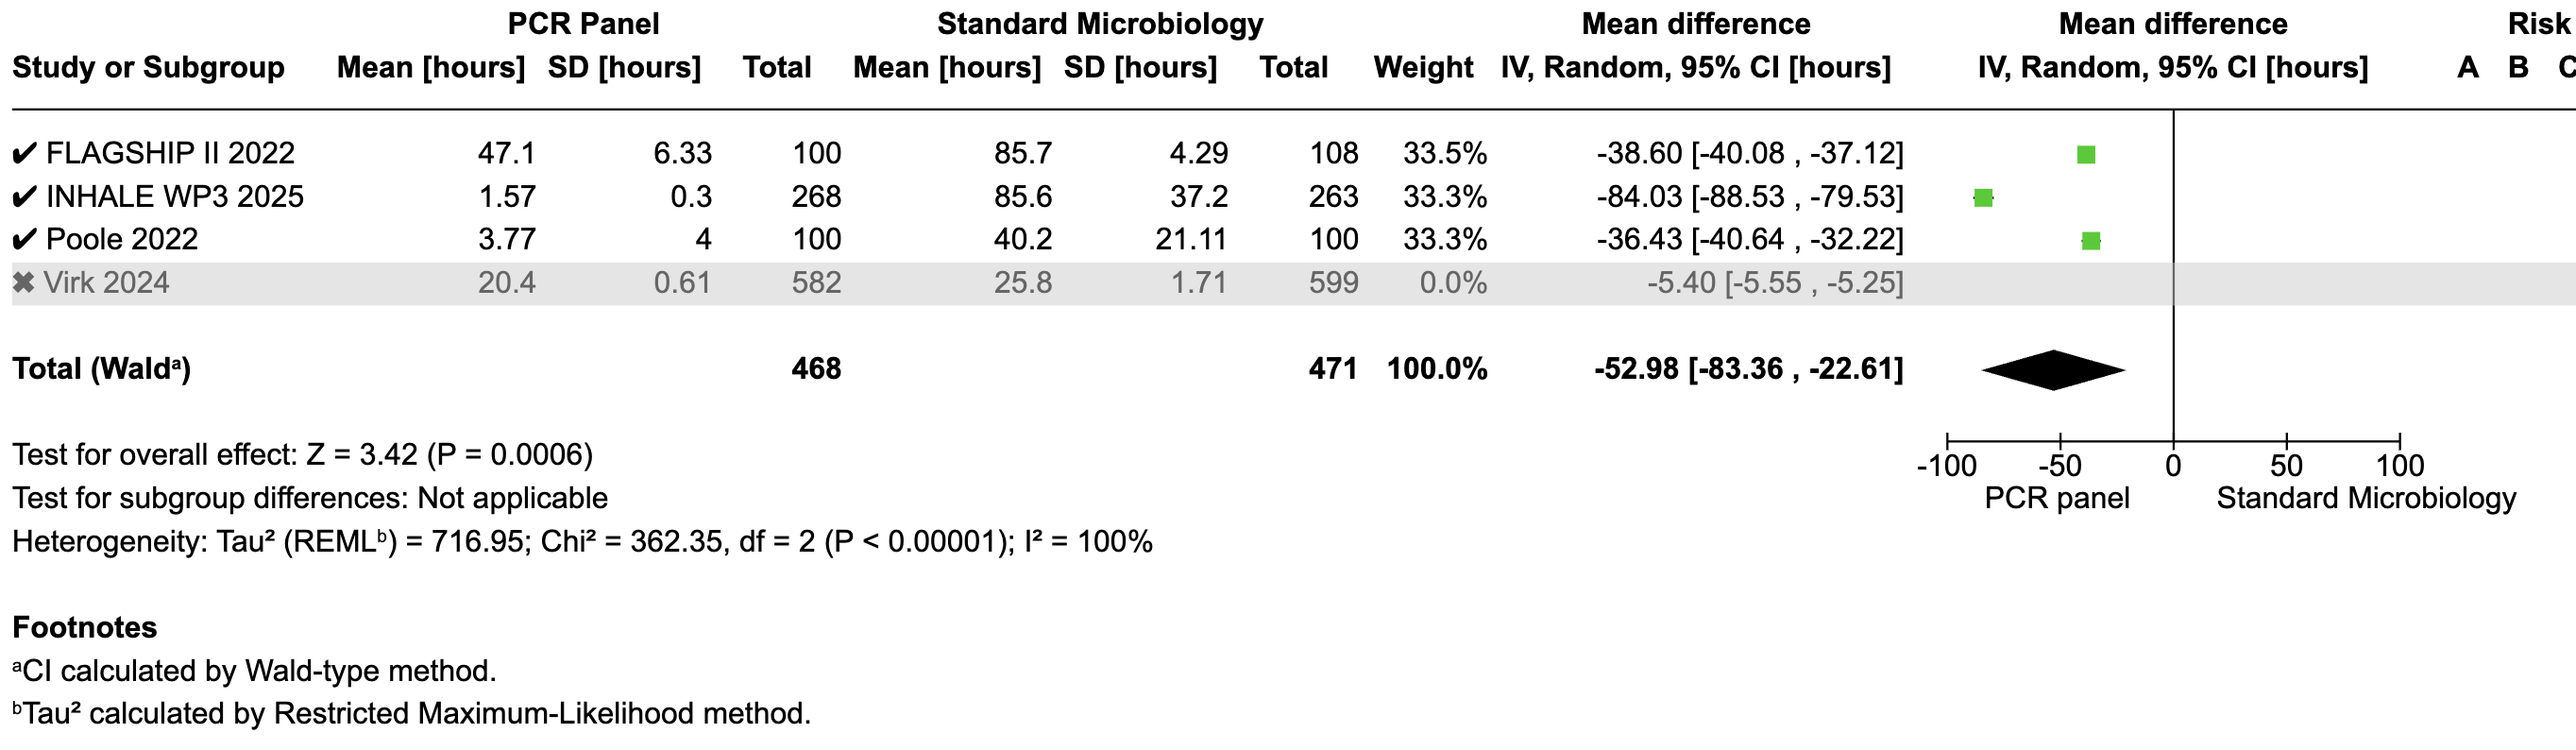

Supplement: Supplementary file 1 [file bb7bda24ac5c9ca906555735.docx]
